# Supplementary material for: Anlotinib Exerts Inhibitory Effects against Cisplatin-Resistant Ovarian Cancer In Vitro and In Vivo
Source: MDPI journal article supplement (doi:10.3390/molecules27248873), 2022-12-14
Supplement: s1 [file s1]

## Supplementary Materials

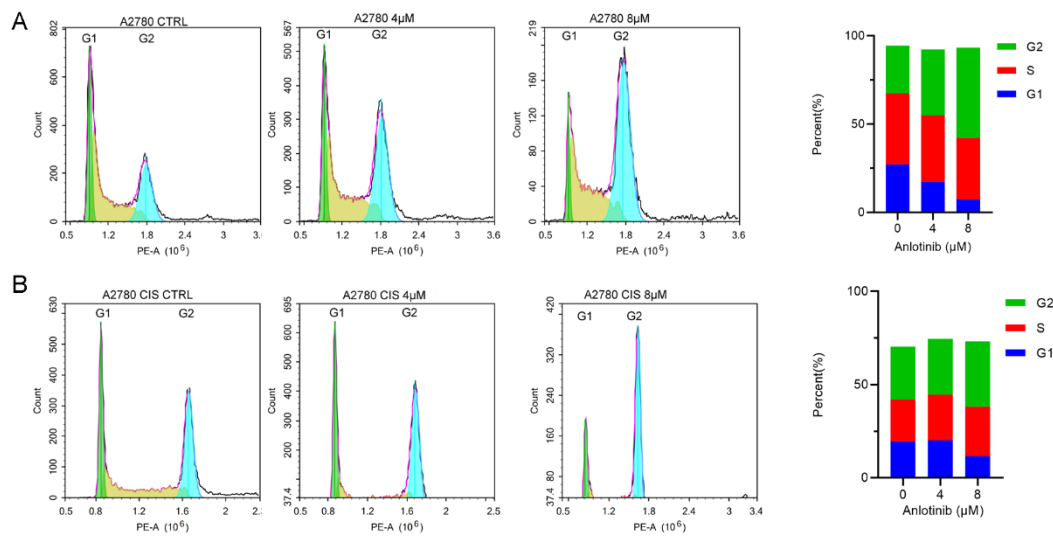

Anlotinib inhibited proliferation by arresting the cell cycle in the G2/M phase.

A2780 cells were treated with anlotinib as indicated concentration. Cell cycle was determined using Flow Cytometry (FCM) analysis.
